# Supplementary material for: SparsePro: an efficient genome-wide fine-mapping method integrating summary statistics and functional annotations
Source: Research Square preprint supplement (doi:10.21203/rs.3.rs-1160063/v1), 2022-01-13
Supplement: Supplementary file 1 [file 0108520ae47f8f454e8a9f69.xlsx]

## Sheet: table_enrichment_read_data
Biomarker	Annotation	log-relative enrichment	SE	p-value
estimated glomerular filtration rate	Conserved_LindbladToh	1.3589	0.120224	2.35081e-21
	DHS_Trynka	0.412263	0.0878731	6.92283e-06
	H3K27ac_Hnisz	0.591705	0.0849437	9.29563e-13
	H3K4me3_Trynka	0.61755	0.0845559	3.55046e-12
	Transcr_Hoffman	0.186685	0.0789856	0.0204597
	TSS_Hoffman	0.755176	0.155108	1.73331e-05
	UTR_3_UCSC	0.698843	0.201002	0.00248461
	UTR_5_UCSC	0.980364	0.255285	0.0015116
	non_synonymous	2.34787	0.155032	9.2612e-29
	Human_Promoter_Villar_ExAC	1.43094	0.264477	2.23182e-05
FEV1-FVC ratio	Conserved_LindbladToh	1.20421	0.137262	9.74676e-14
	DHS_Trynka	0.552288	0.0921546	1.13825e-08
	H3K27ac_Hnisz	0.670994	0.0914287	4.45851e-14
	H3K4me3_Trynka	0.633714	0.0927241	1.00958e-10
	Transcr_Hoffman	0.110212	0.0855881	0.214506
	TSS_Hoffman	0.646561	0.187057	0.00231512
	UTR_3_UCSC	0.445497	0.259996	0.144146
	UTR_5_UCSC	0.464477	0.373683	0.341019
	non_synonymous	1.73077	0.245518	7.35094e-08
	Human_Promoter_Villar_ExAC	0.961431	0.387659	0.055231
glucose	Conserved_LindbladToh	1.54818	0.235868	1.03344e-07
	DHS_Trynka	0.551665	0.176828	0.00361448
	H3K27ac_Hnisz	0.219115	0.169202	0.221968
	H3K4me3_Trynka	0.769268	0.170625	2.406e-05
	Transcr_Hoffman	0.136095	0.164455	0.45698
	TSS_Hoffman	0.555503	0.341809	0.188639
	UTR_3_UCSC	1.20081	0.331467	0.00401855
	UTR_5_UCSC	0.958384	0.505769	0.178174
	non_synonymous	2.26612	0.345545	3.21633e-06
	Human_Promoter_Villar_ExAC	1.6496	0.464382	0.0116574
pulse rate	Conserved_LindbladToh	1.27279	0.155081	4.42012e-12
	DHS_Trynka	0.531133	0.113016	8.63473e-06
	H3K27ac_Hnisz	0.697993	0.107797	3.86441e-11
	H3K4me3_Trynka	0.628573	0.113357	1.86403e-07
	Transcr_Hoffman	0.0628574	0.103463	0.579184
	TSS_Hoffman	0.74728	0.219076	0.00323243
	UTR_3_UCSC	0.783546	0.272655	0.0161082
	UTR_5_UCSC	1.13477	0.33816	0.00831937
	non_synonymous	2.1989	0.235177	7.91336e-12
	Human_Promoter_Villar_ExAC	1.46573	0.368875	0.00282656
total protein	Conserved_LindbladToh	1.27213	0.146501	2.94888e-13
	DHS_Trynka	0.48896	0.0983834	2.11949e-06
	H3K27ac_Hnisz	0.763402	0.103268	9.03533e-15
	H3K4me3_Trynka	0.705519	0.0941145	9.69075e-13
	Transcr_Hoffman	0.292948	0.0899305	0.00134072
	TSS_Hoffman	1.05746	0.147932	7.69565e-10
	UTR_3_UCSC	0.6016	0.235065	0.0270178
	UTR_5_UCSC	1.25094	0.245514	3.92103e-05
	non_synonymous	1.99818	0.200807	6.43426e-14
	Human_Promoter_Villar_ExAC	0.591379	0.435457	0.319496
