# Supplementary material for: SparsePro: an efficient genome-wide fine-mapping method integrating summary statistics and functional annotations
Source: Research Square preprint supplement (doi:10.21203/rs.3.rs-1160063/v1), 2022-01-13
Supplement: Supplementary file 2 [file dbf83df48f0f388795d1a924.xlsx]

## Sheet: simulation_enrichment
Annotation	log-relative enrichment	SE	p-value	Simulated to have a two-fold enrichment of causal variants
H3K4me3_Trynka	1.85144	0.0951962	4.32635e-89	Yes
Conserved_LindbladToh	2.48477	0.100215	2.84864e-87	Yes
DHS_Trynka	1.74324	0.0921537	3.24592e-79	Yes
non_synonymous	2.89343	0.132892	1.05215e-54	Yes
H3K27ac_Hnisz	1.68205	0.15708	2.23662e-40	Yes
TSS_Hoffman	1.46954	0.120159	7.36431e-25	No
UTR_5_UCSC	1.05745	0.233658	0.000177177	No
UTR_3_UCSC	0.691186	0.189329	0.00135074	No
Human_Promoter_Villar_ExAC	1.10874	0.31398	0.00492522	No
Transcr_Hoffman	0.0837847	0.0902083	0.37702	No
